# Supplementary material for: Enhanced HDL Functionality in Small HDL Species Produced Upon Remodeling of HDL by Reconstituted HDL, CSL112: Effects on Cholesterol Efflux, Anti-Inflammatory and Antioxidative Activity
Source: PubMed Central journal article supplement (PMC5006797; doi:10.1161/circresaha.116.308685), 2016-09-01
Supplement: res-119-751-s001.pdf [file res-119-751-s001.pdf]

## Circulation Research

---

**From:** Asztalos, Bela <Bela.Asztalos@tufts.edu>  
**Sent:** Wednesday, July 06, 2016 8:52 AM  
**To:** circulation.research@circresearch.com  
**Cc:** Kate.Holliday@meridian-health.com  
**Subject:** permission

I give permission to the Circulation Journal for using my name in the article titled "**Enhanced HDL functionality in small HDL species produced upon remodeling of HDL by reconstituted HDL, CSL112: effects on cholesterol efflux, anti-inflammatory and antioxidative activity**"

Sincerely,  
Bela Asztalos
